# Supplementary material for: Performance Comparison of Recombinant Baculovirus and Rabies Virus-like Particles production Using Two Culture Platforms
Source: MDPI journal article supplement (doi:10.3390/vaccines11010039), 2022-12-24

## Supplementary material

**Figure S1.** Kinetics profiles of viable cell density and viability from Sf9 cells co-infected with recombinant baculoviruses carrying the rabies glycoprotein (BVG) and matrix protein (BVM) with a ratio between BVG and BVM of 1.5 using Schott flask as culture system. **A)** Coinfection 1: BVM 1 pfu/cell – BVG 1.5 pfu/cell. **B)** Coinfection 2: BVM 3 pfu/cell – BVG 4.5 pfu/cell. **C)** Coinfection 3: BVM 5 pfu/cell – BVG 7.5 pfu/cell. The points depict the average from three repetitions. Error bars represent the standard deviation from repetitions.

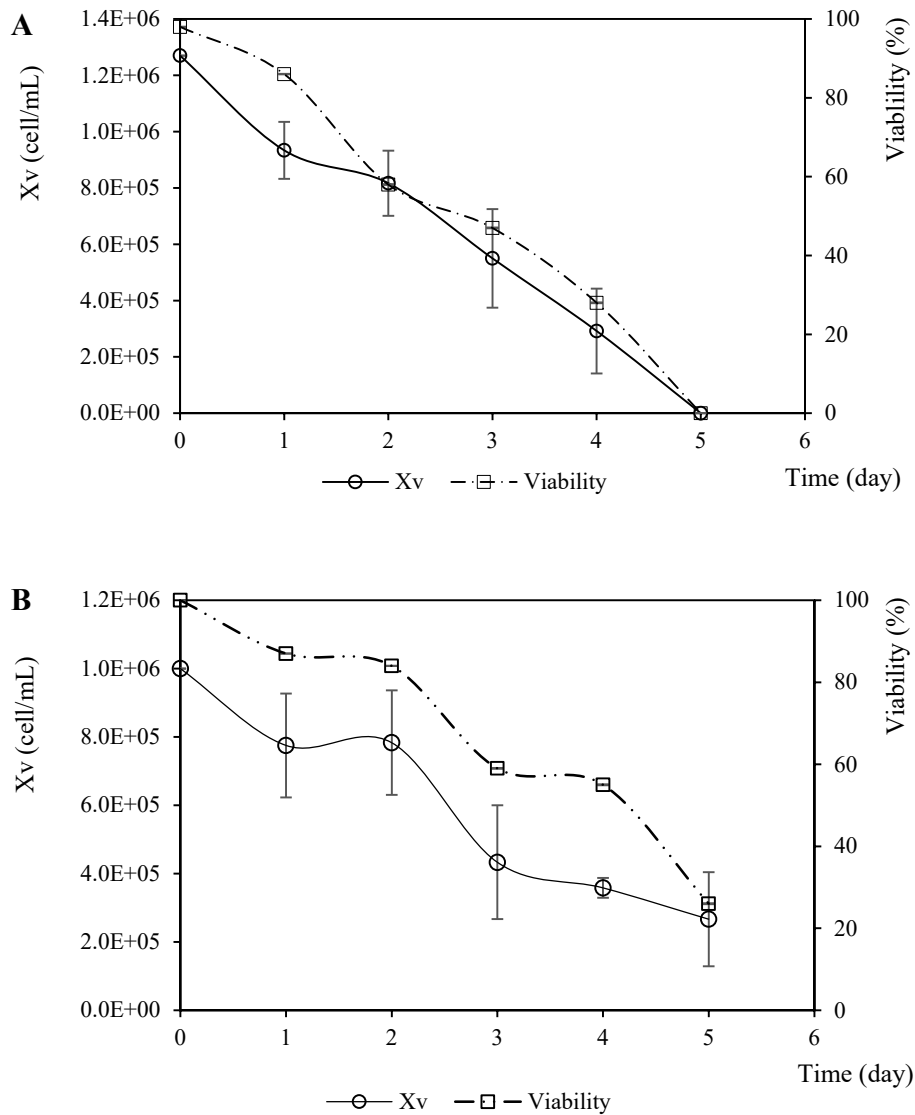

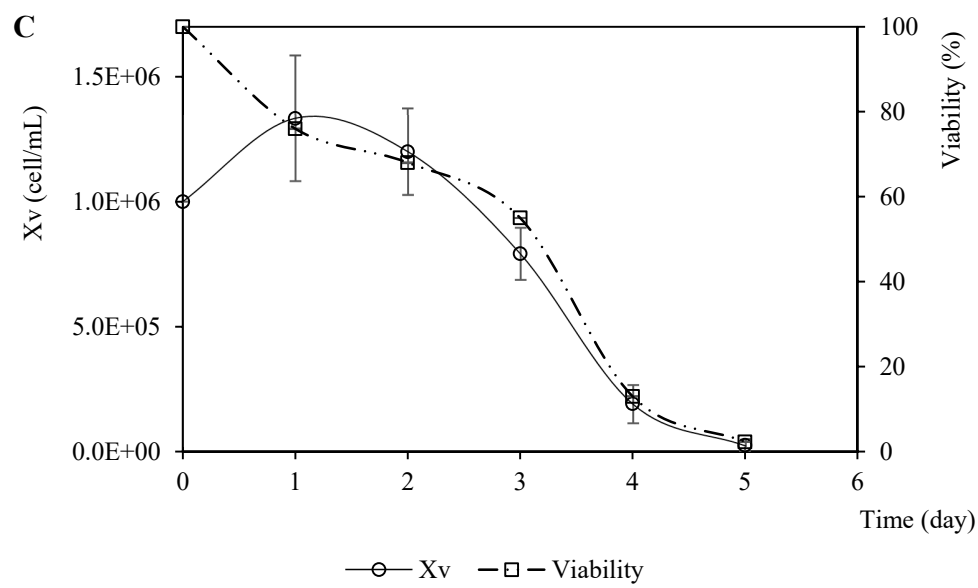

**Figure S2.** Kinetics profiles of viable cell density and viability from Sf9 cells co-infected with recombinant baculoviruses carrying the rabies glycoprotein (BVG) and matrix protein (BVM) with a ratio between BVG and BVM of 2.0 using Schott flask as culture system. **A)** Coinfection 1: BVM 1 pfu/cell – BVG 2.0 pfu/cell. **B)** Coinfection 2: BVM 3 pfu/cell – BVG 6.0 pfu/cell. **C)** Coinfection 3: BVM 5 pfu/cell – BVG 10.0 pfu/cell. The points depict the average from three repetitions. Error bars represent the standard deviation from repetitions.

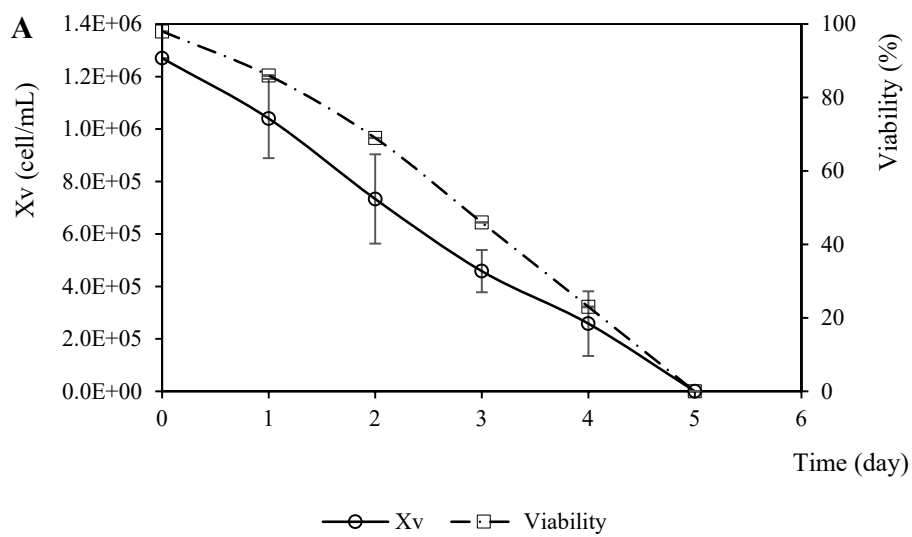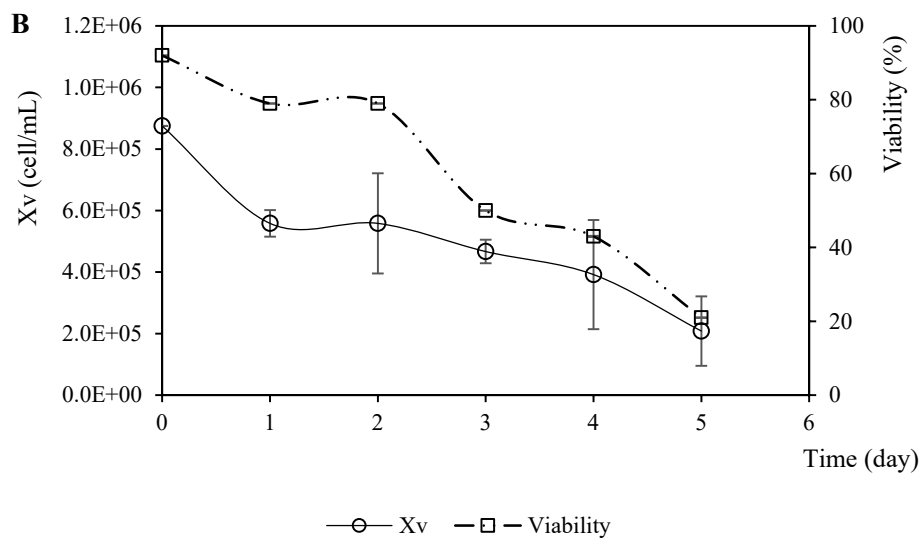

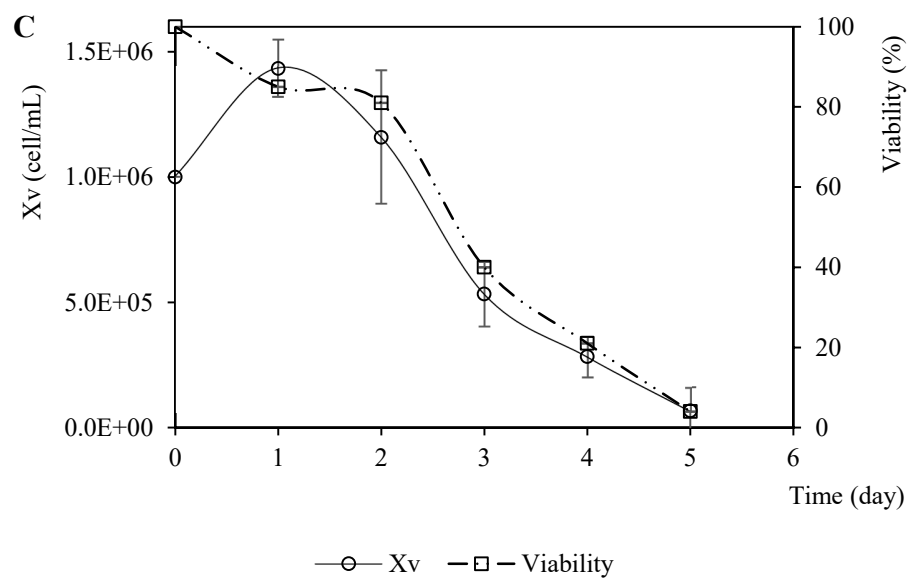

**Figure S3.** Kinetics profiles of viable cell density and viability from Sf9 cells co-infected with recombinant baculoviruses carrying the rabies glycoprotein (BVG) and matrix protein (BVM) with a ratio between BVG and BVM of 2.5 using Schott flask as culture system. **A)** Coinfection 1: BVM 1 pfu/cell – BVG 2.5 pfu/cell. **B)** Coinfection 2: BVM 3 pfu/cell – BVG 7.5 pfu/cell. **C)** Coinfection 3: BVM 5 pfu/cell – BVG 12.5 pfu/cell. The points depict the average from three repetitions. Error bars represent the standard deviation from repetitions.

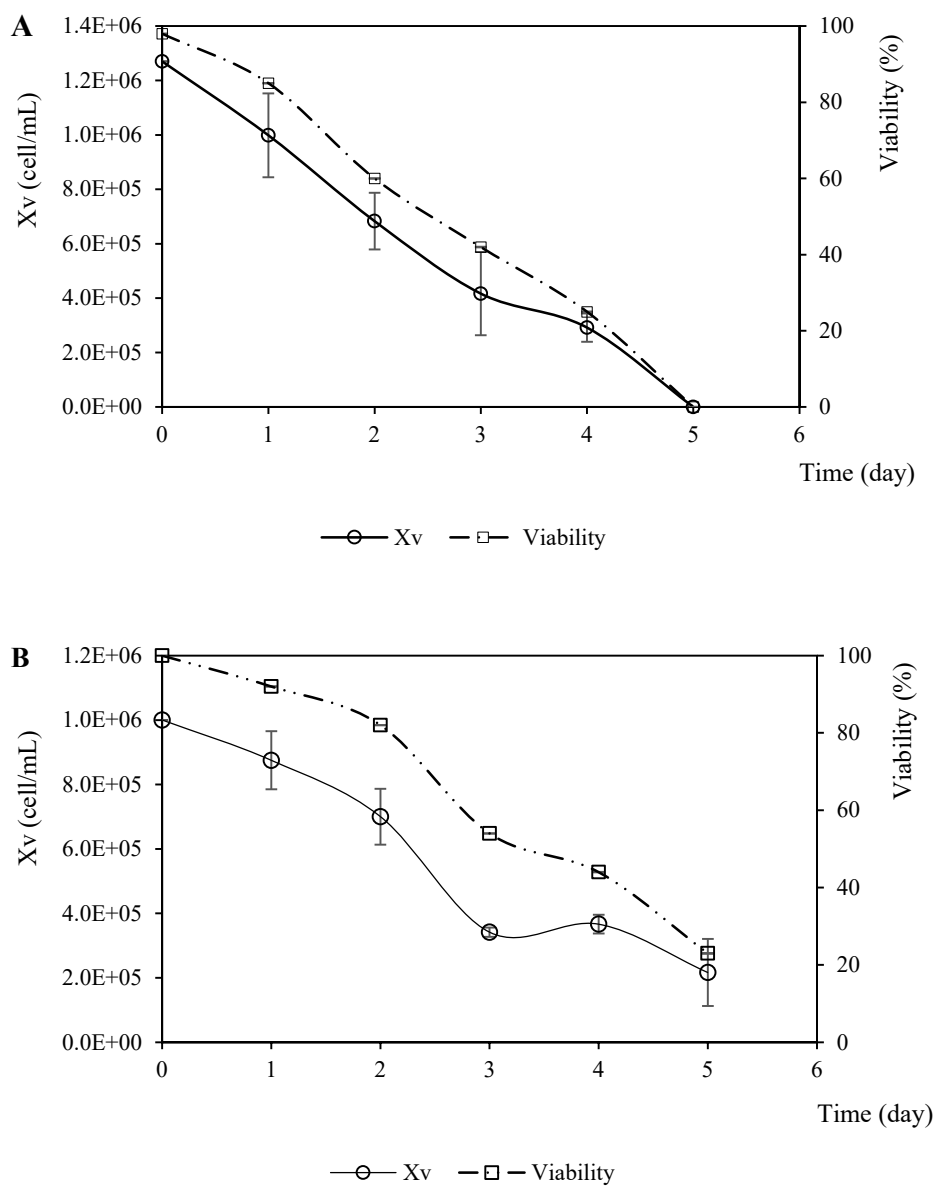

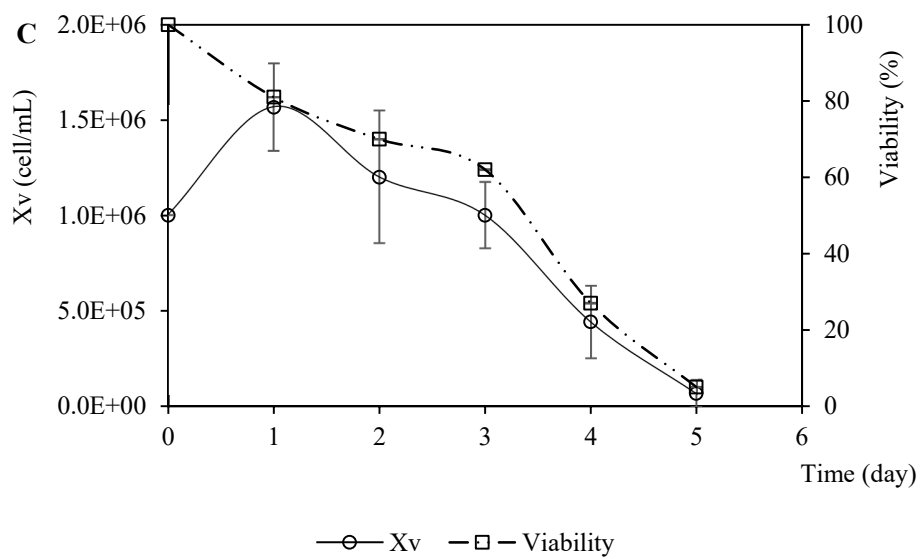

**Figure S4.** Kinetics profiles of rabies matrix protein (RVM) production (measured by the signal intensity of the dot blot membrane labeled with anti-RVM antibody) from Sf9 cells co-infected with recombinant baculoviruses carrying the rabies glycoprotein (BVG) and matrix protein (BVM) with a ratio between BVG and BVM of 1.5 using Schott flask as culture system. **A)** Coinfection 1: BVM 1 pfu/cell – BVG 1.5 pfu/cell. **B)** Coinfection 2: BVM 3 pfu/cell – BVG 4.5 pfu/cell. **C)** Coinfection 3: BVM 5 pfu/cell – BVG 7.5 pfu/cell. The points depict the average from three repetitions. Error bars represent the standard deviation from repetitions.

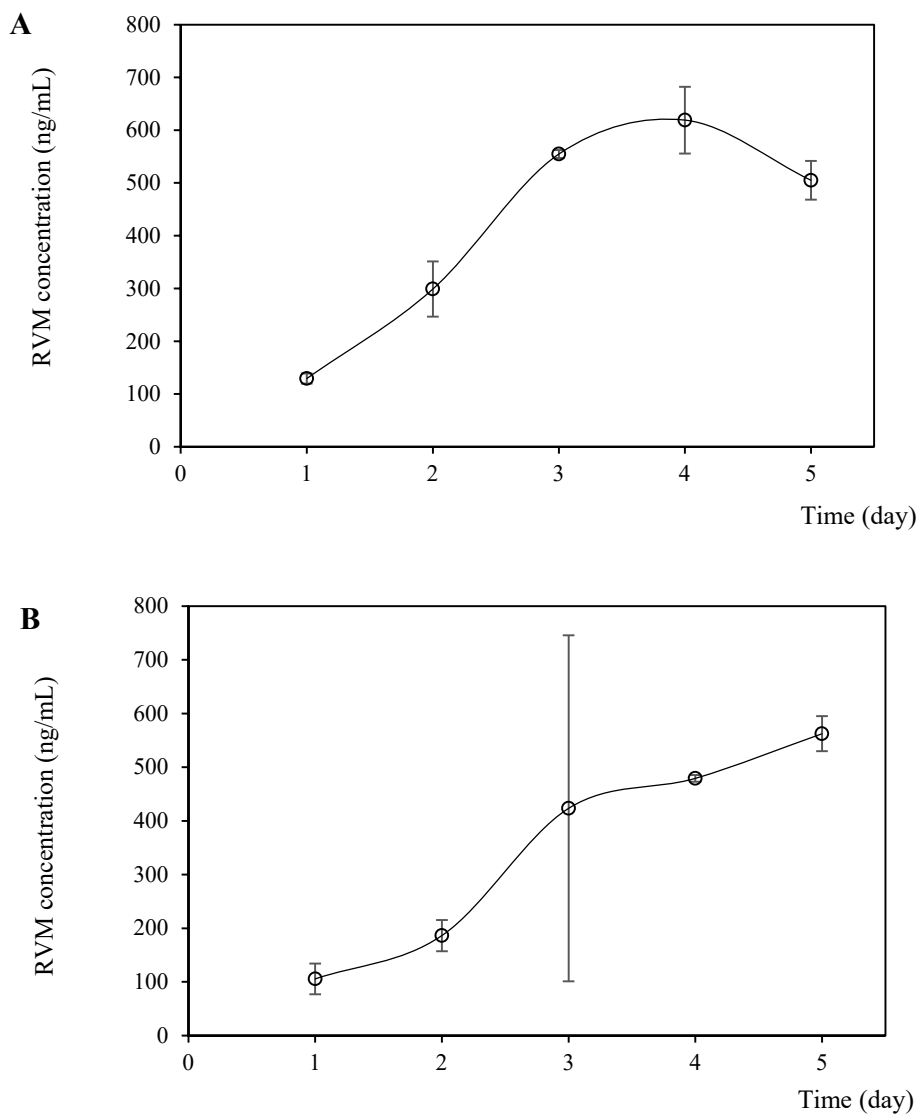

C

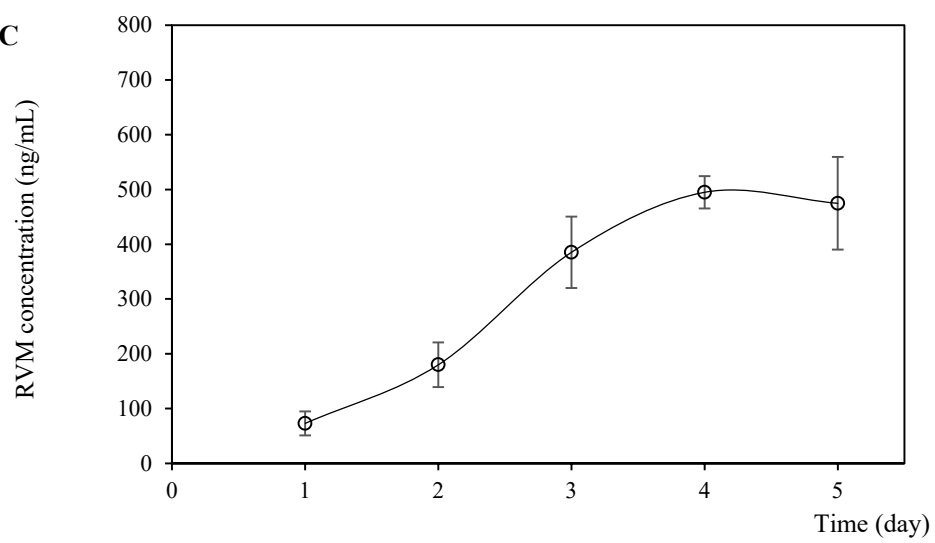



**Figure S5.** Kinetics profiles of rabies matrix protein (RVM) production (measured by the signal intensity of the dot blot membrane labeled with anti-RVM antibody) from Sf9 cells co-infected with recombinant baculoviruses carrying the rabies glycoprotein (BVG) and matrix protein (BVM) with a ratio between BVG and BVM of 2.0 using Schott flask as culture system. **A)** Coinfection 1: BVM 1 pfu/cell – BVG 2.0 pfu/cell. **B)** Coinfection 2: BVM 3 pfu/cell – BVG 6.0 pfu/cell. **C)** Coinfection 3: BVM 5 pfu/cell – BVG 10.0 pfu/cell. The points depict the average from three repetitions. Error bars represent the standard deviation from repetitions.

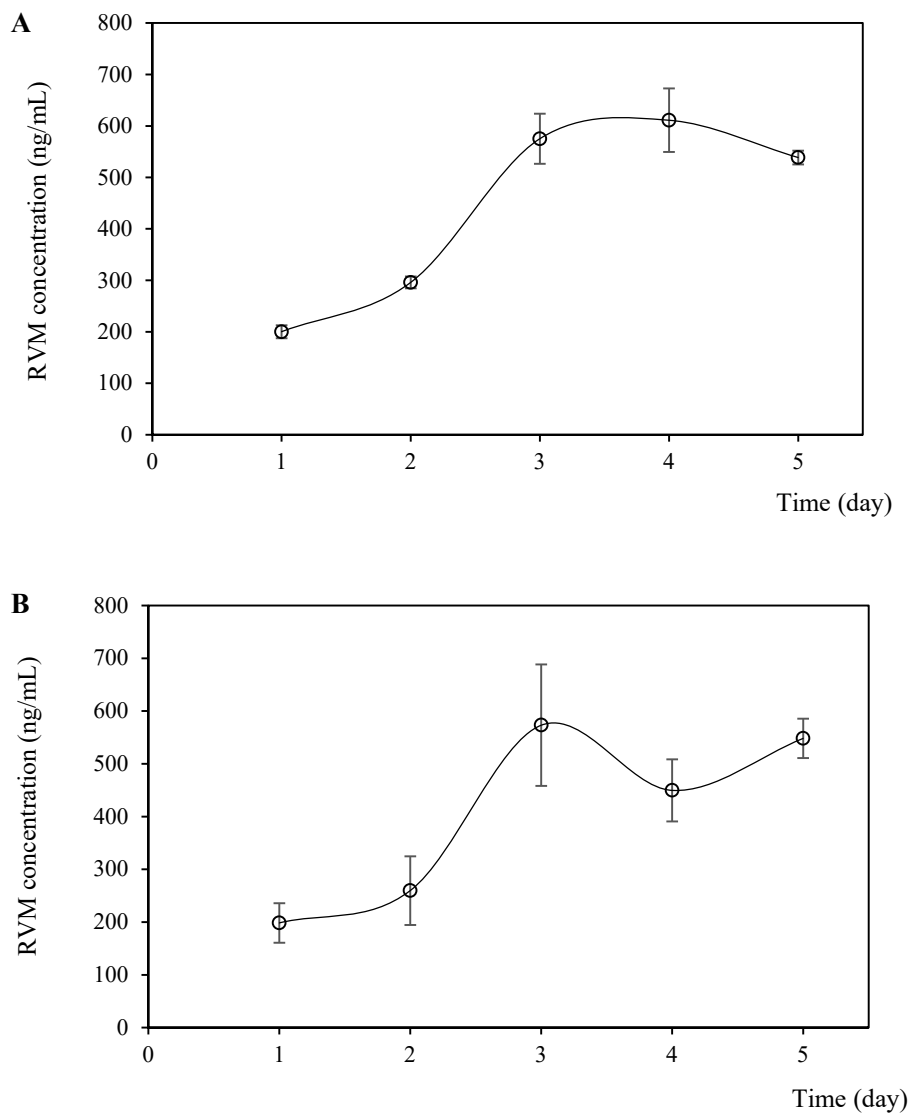

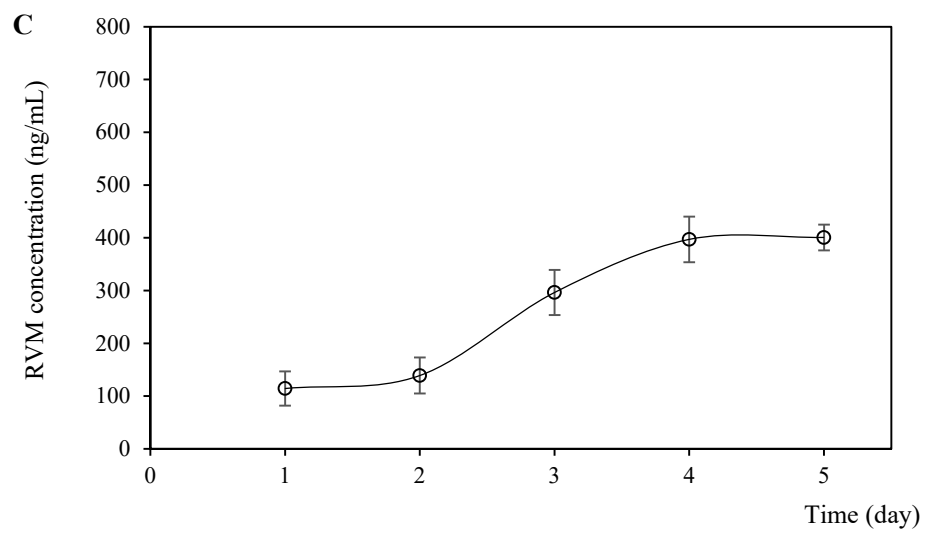

**Figure S6.** Kinetics profiles of rabies matrix protein (RVM) production (measured by the signal intensity of the dot blot membrane labeled with anti-RVM antibody) from Sf9 cells co-infected with recombinant baculoviruses carrying the rabies glycoprotein (BVG) and matrix protein (BVM) with a ratio between BVG and BVM of 2.5 using Schott flask as culture system. **A)** Coinfection 1: BVM 1 pfu/cell – BVG 2.5 pfu/cell. **B)** Coinfection 2: BVM 3 pfu/cell – BVG 7.5 pfu/cell. **C)** Coinfection 3: BVM 5 pfu/cell – BVG 12.5 pfu/cell. The points depict the average from three repetitions. Error bars represent the standard deviation from repetitions.

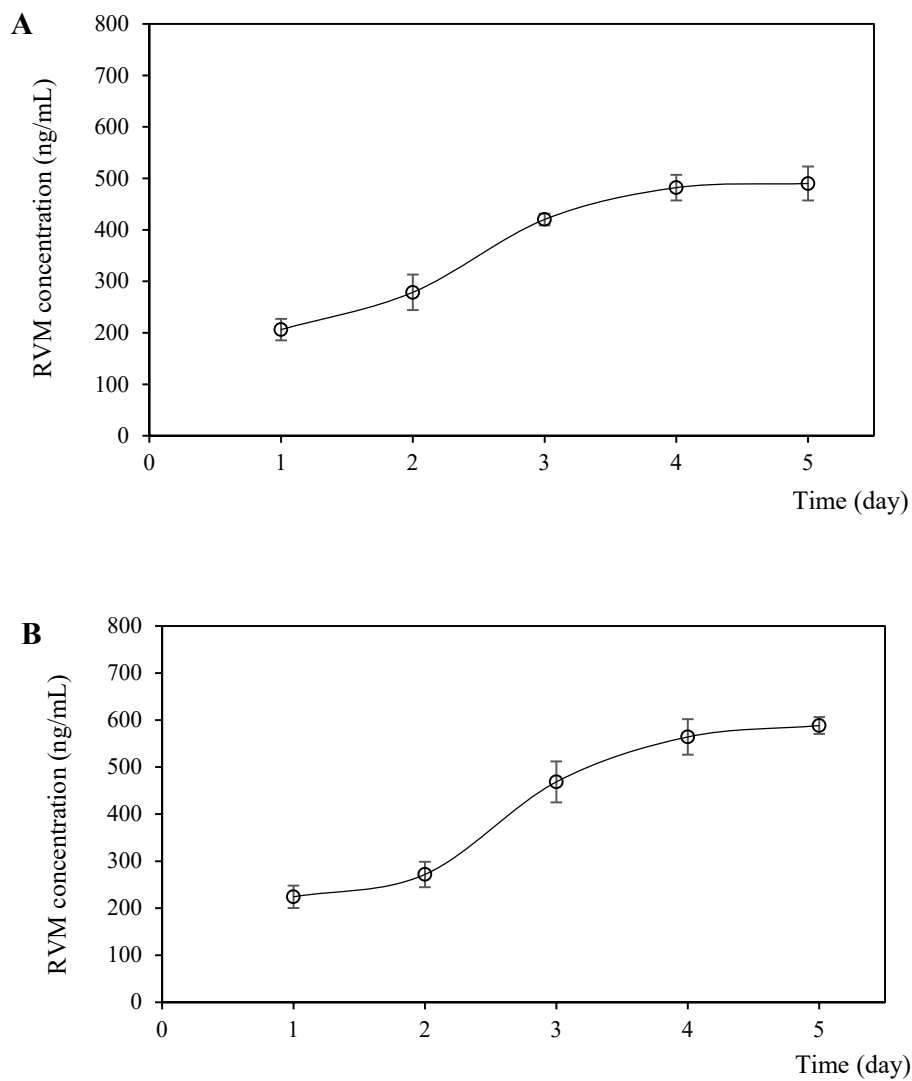

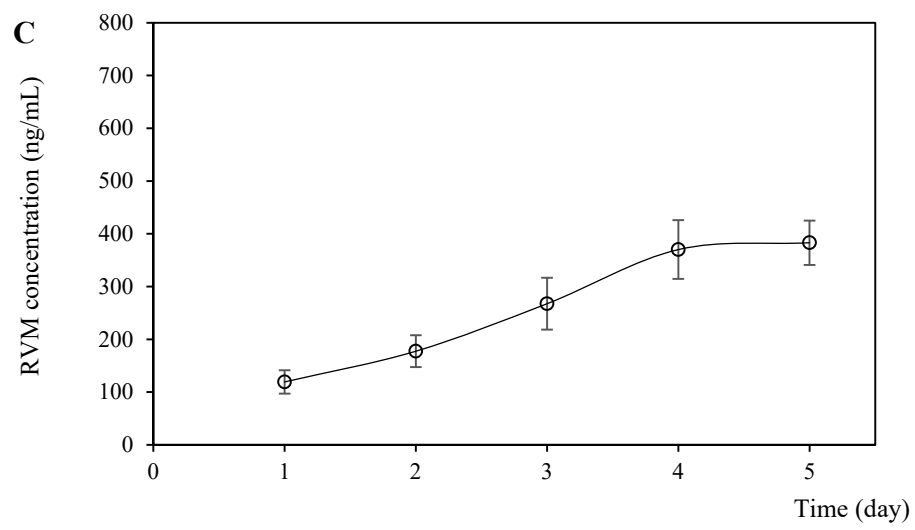

Figure S7. Perturbation graph of BVM MOI (A), BVG/BVM MOI ratio (B), and HT (C) on rabies M protein concentration (RVM) (determined by Dot-blot) modelled statistically.

A

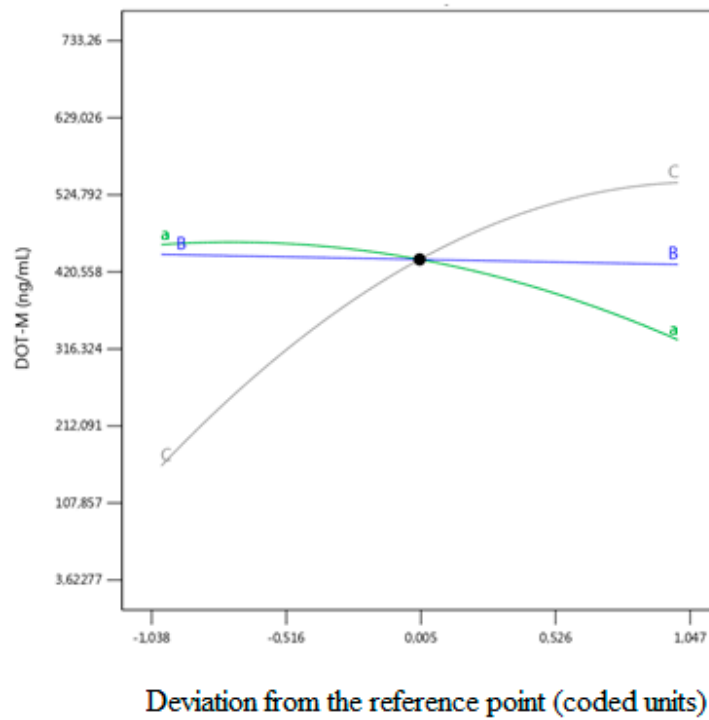

**Figure S8.** Kinetics profiles of rabies G glycoprotein (RVGP) production (measured by the signal intensity of the dot blot membrane labeled with anti-RVGP antibody) from Sf9 cells co-infected with recombinant baculoviruses carrying the rabies glycoprotein (BVG) and matrix protein (BVM) with a ratio between BVG and BVM of 1.5 using Schott flask as culture system. **A)** Coinfection 1: BVM 1 pfu/cell – BVG 1.5 pfu/cell. **B)** Coinfection 2: BVM 3 pfu/cell – BVG 4.5 pfu/cell. **C)** Coinfection 3: BVM 5 pfu/cell – BVG 7.5 pfu/cell. The points depict the average from three repetitions. Error bars represent the standard deviation from repetitions.

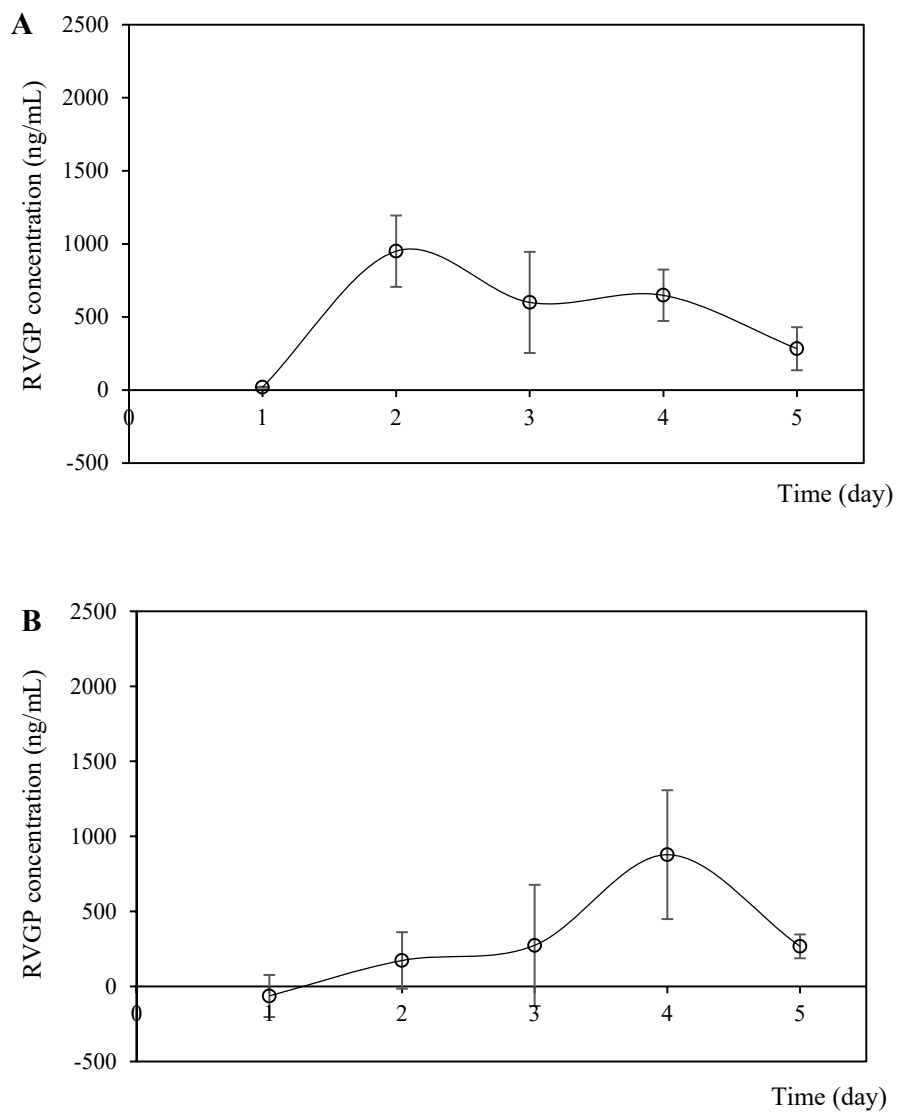

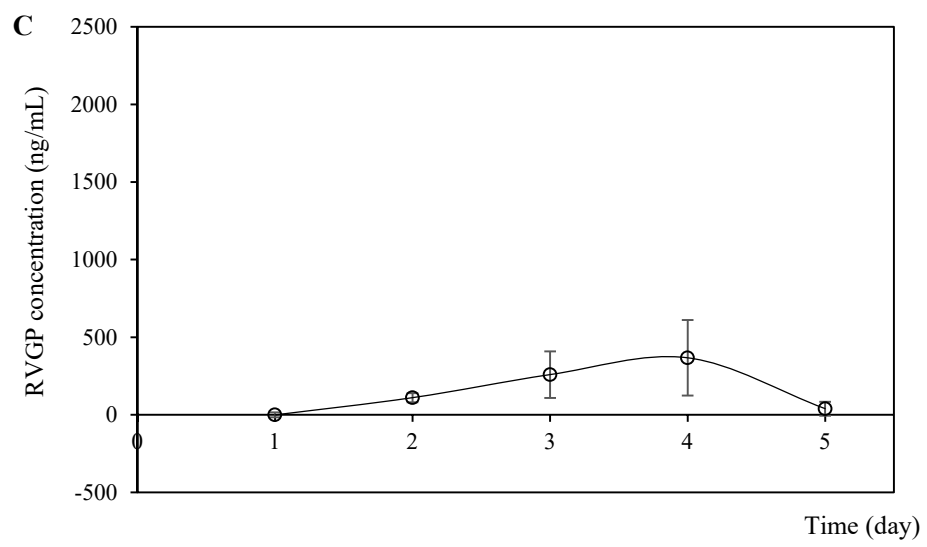

**Figure S9.** Kinetics profiles of rabies G glycoprotein (RVGP) production (measured by the signal intensity of the dot blot membrane labeled with anti-RVGP antibody) from Sf9 cells co-infected with recombinant baculoviruses carrying the rabies glycoprotein (BVG) and matrix protein (BVM) with a ratio between BVG and BVM of 2.0 using Schott flask as culture system. **A)** Coinfection 1: BVM 1 pfu/cell – BVG 2.0 pfu/cell. **B)** Coinfection 2: BVM 3 pfu/cell – BVG 6.0 pfu/cell. **C)** Coinfection 3: BVM 5 pfu/cell – BVG 10.0 pfu/cell. The points depict the average from three repetitions. Error bars represent the standard deviation from repetitions.

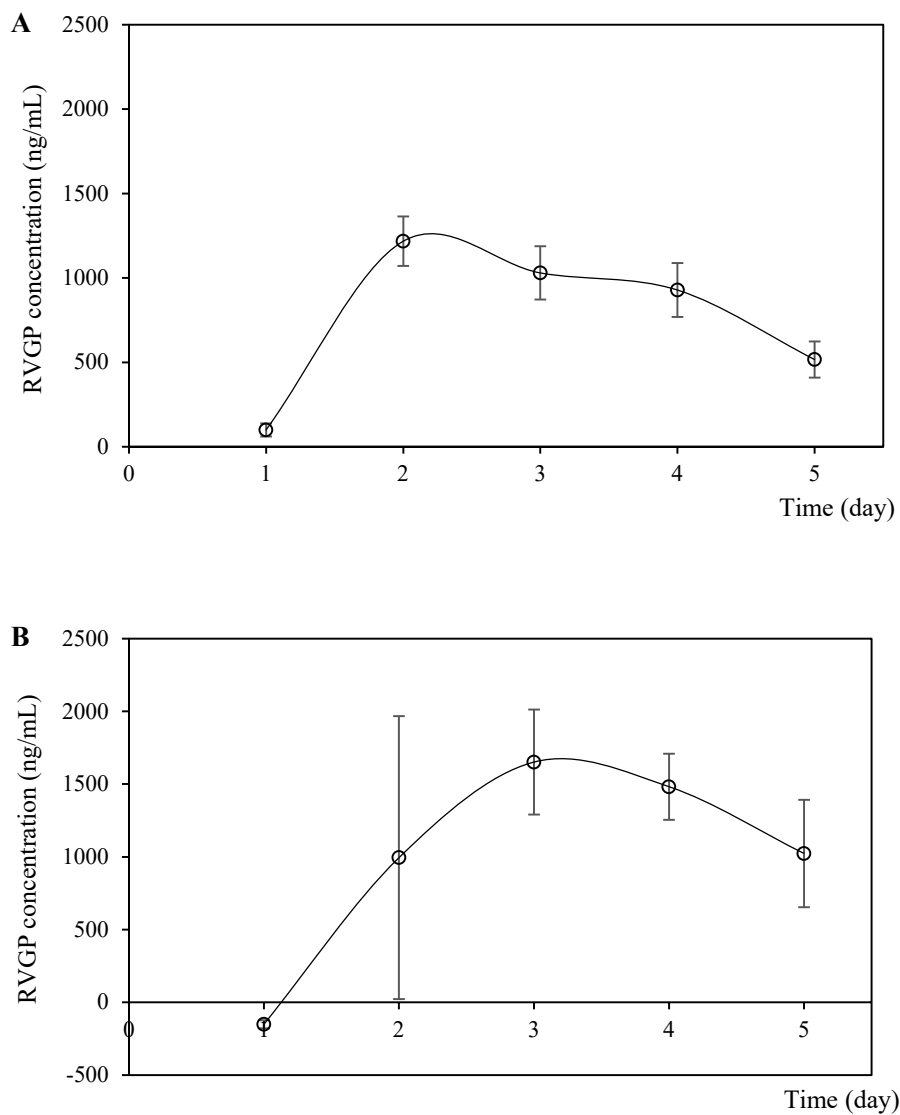



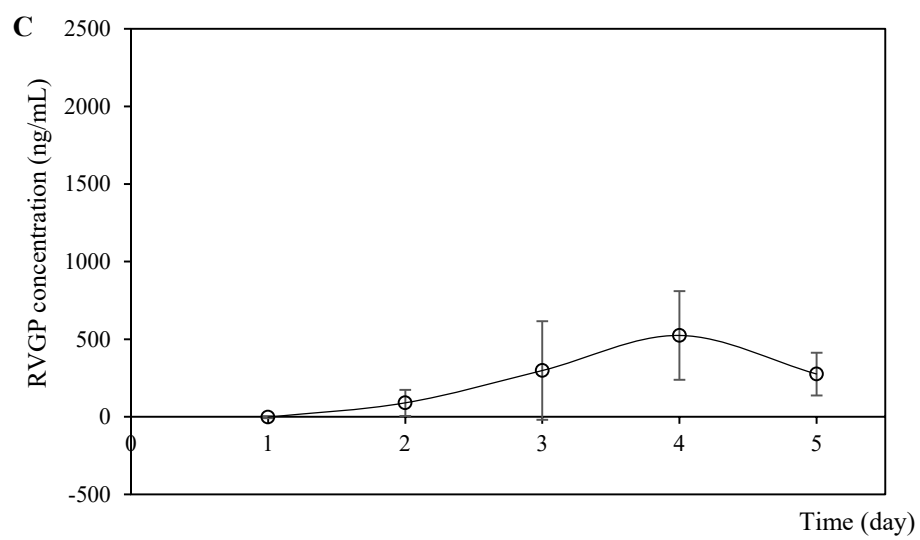

**Figure S10.** Kinetics profiles of rabies G glycoprotein (RVGP) production (measured by the signal intensity of the dot blot membrane labeled with anti-RVGP antibody) from Sf9 cells co-infected with recombinant baculoviruses carrying the rabies glycoprotein (BVG) and matrix protein (BVM) with a ratio between BVG and BVM of 2.5 using Schott flask as culture system. **A)** Coinfection 1: BVM 1 pfu/cell – BVG 2.5 pfu/cell. **B)** Coinfection 2: BVM 3 pfu/cell – BVG 7.5 pfu/cell. **C)** Coinfection 3: BVM 5 pfu/cell – BVG 12.5 pfu/cell. The points depict the average from three repetitions. Error bars represent the standard deviation from repetitions.

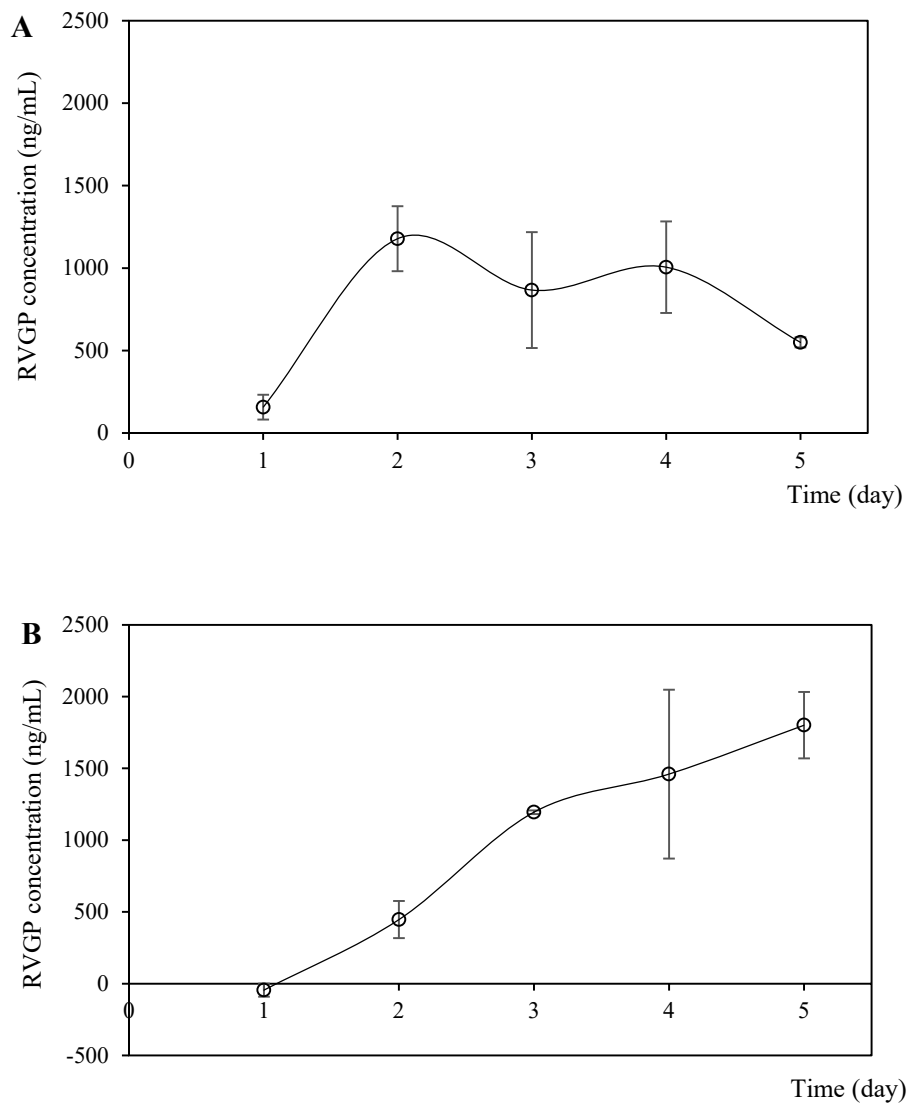

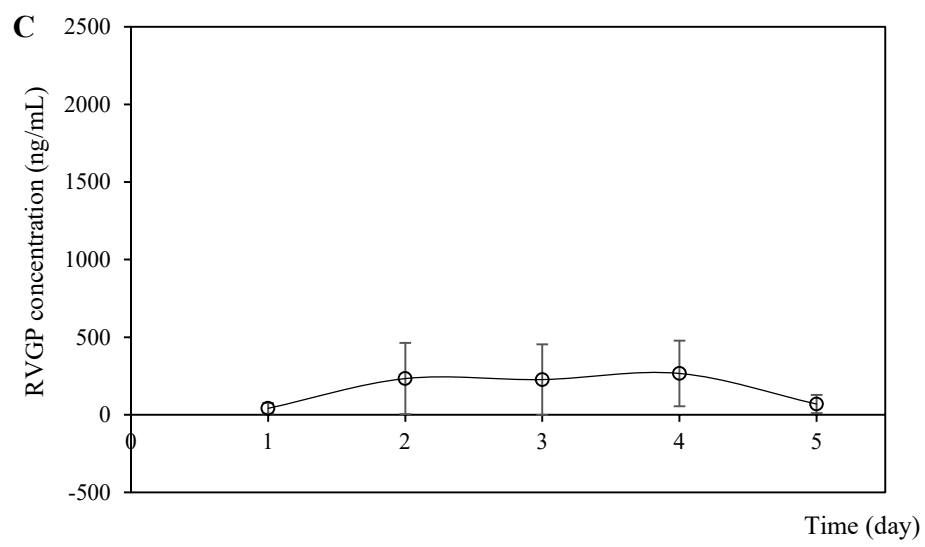

Figure S11. Perturbation graph of BVM MOI (A), BVG/BVM MOI ratio (B), and HT (C) on rabies G glycoprotein concentration (RVGP) (determined by Dot-blot) modelled statistically.

B

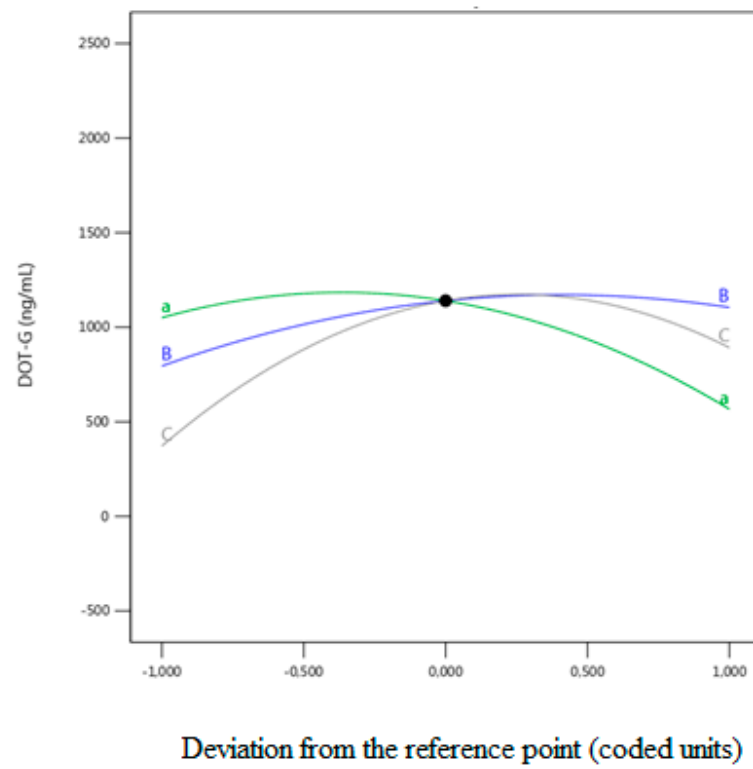

**Figure S12.** Kinetics profiles of rabies G glycoprotein (RVGP) production (measured by ELISA) from Sf9 cells co-infected with recombinant baculoviruses carrying the rabies glycoprotein (BVG) and matrix protein (BVM) with a ratio between BVG and BVM of 1.5 using Schott flask as culture system. **A)** Coinfection 1: BVM 1 pfu/cell – BVG 1.5 pfu/cell. **B)** Coinfection 2: BVM 3 pfu/cell – BVG 4.5 pfu/cell. **C)** Coinfection 3: BVM 5 pfu/cell – BVG 7.5 pfu/cell. The points depict the average from three repetitions. Error bars represent the standard deviation from repetitions.

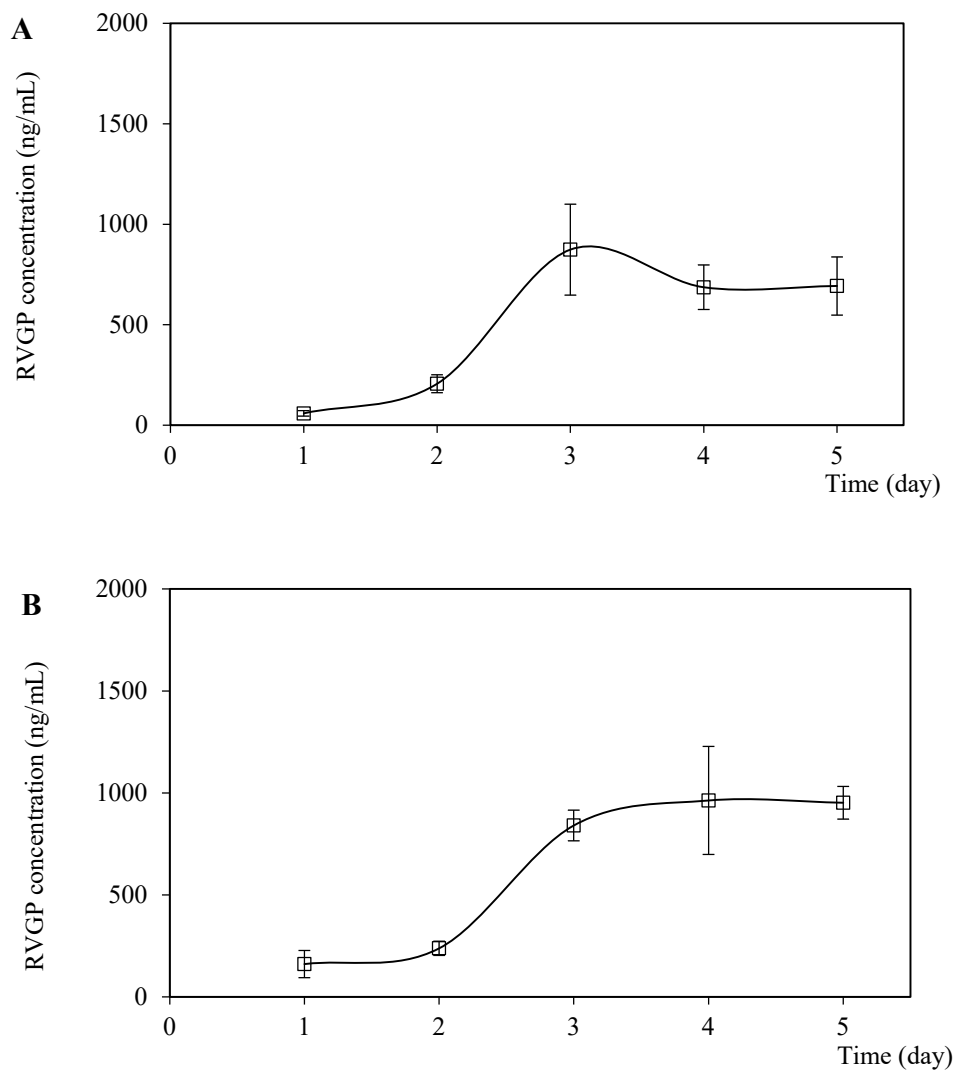

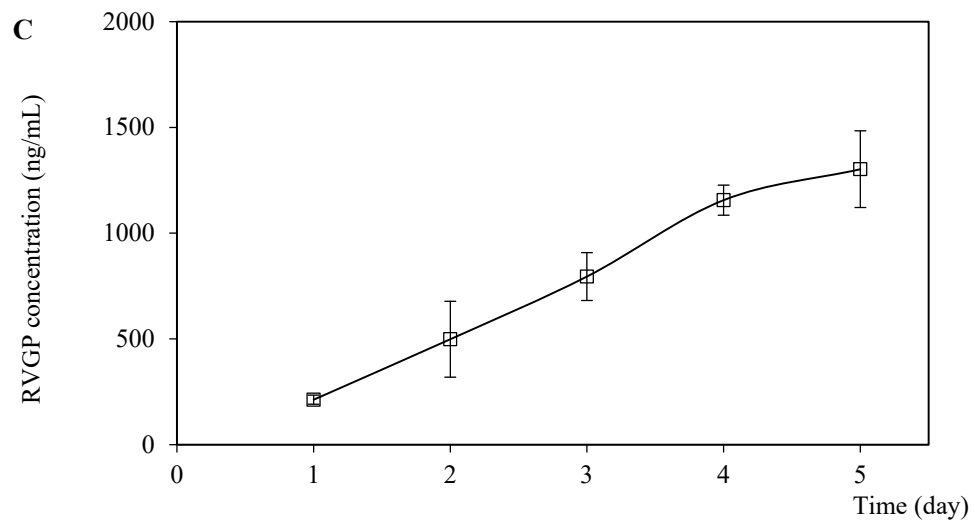

**Figure S13.** Kinetics profiles of rabies G glycoprotein (RVGP) production (measured by ELISA) from Sf9 cells co-infected with recombinant baculoviruses carrying the rabies glycoprotein (BVG) and matrix protein (BVM) with a ratio between BVG and BVM of 2.0 using Schott flask as culture system. **A)** Coinfection 1: BVM 1 pfu/cell – BVG 2.0 pfu/cell. **B)** Coinfection 2: BVM 3 pfu/cell – BVG 6.0 pfu/cell. **C)** Coinfection 3: BVM 5 pfu/cell – BVG 10.0 pfu/cell. The points depict the average from three repetitions. Error bars represent the standard deviation from repetitions.

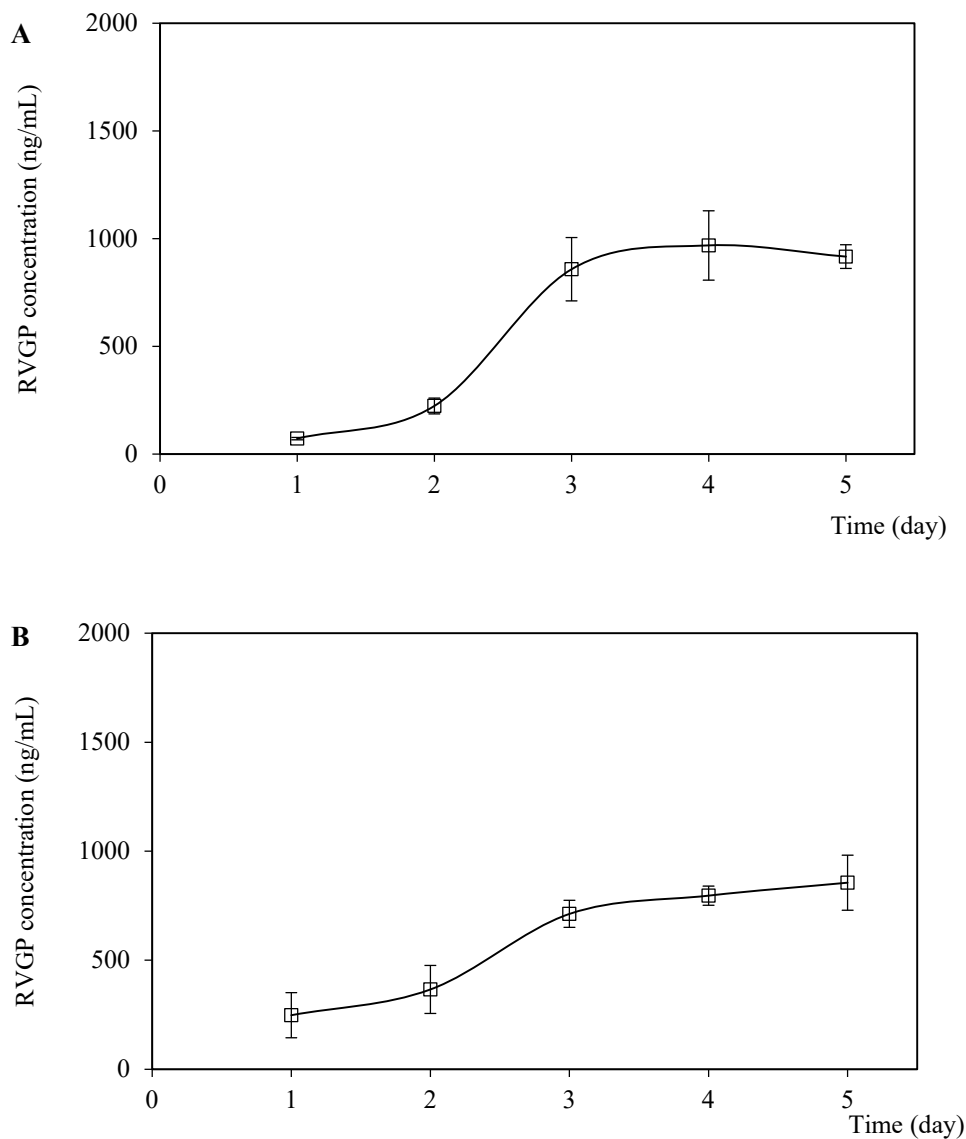

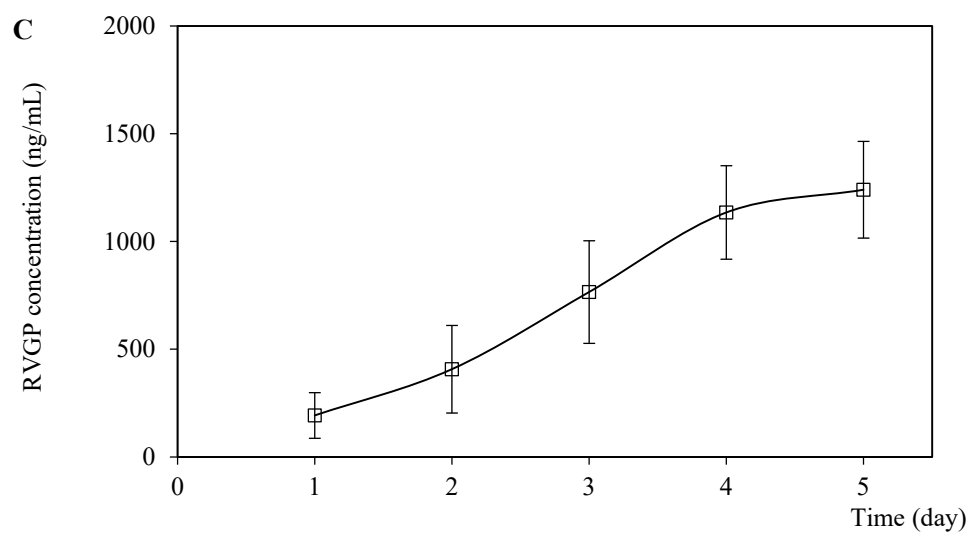



**Figure S14.** Kinetics profiles of rabies G glycoprotein (RVGP) production (measured by ELISA) from Sf9 cells co-infected with recombinant baculoviruses carrying the rabies glycoprotein (BVG) and matrix protein (BVM) with a ratio between BVG and BVM of 2.5 using Schott flask as culture system. **A)** Coinfection 1: BVM 1 pfu/cell – BVG 2.5 pfu/cell. **B)** Coinfection 2: BVM 3 pfu/cell – BVG 7.5 pfu/cell. **C)** Coinfection 3: BVM 5 pfu/cell – BVG 12.5 pfu/cell. The points depict the average from three repetitions. Error bars represent the standard deviation from repetitions.

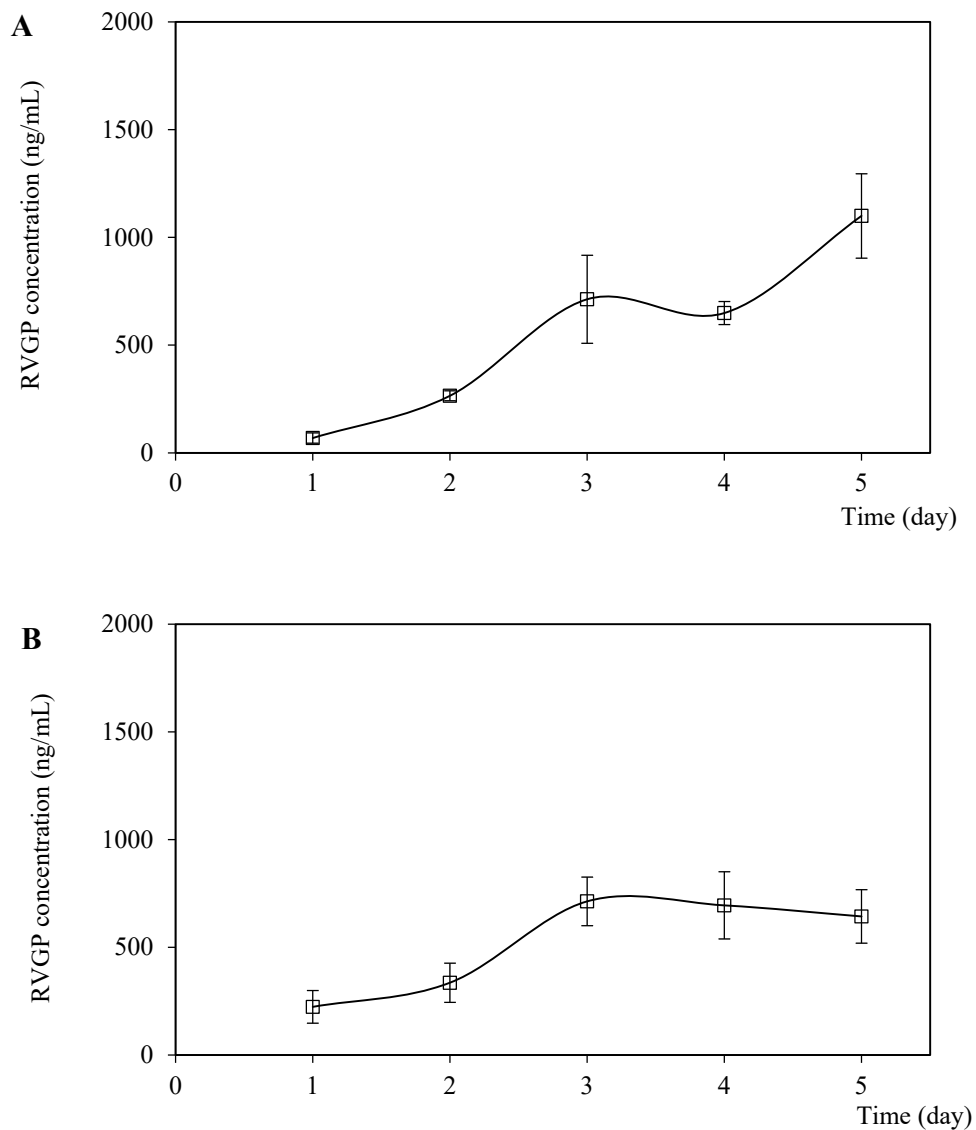

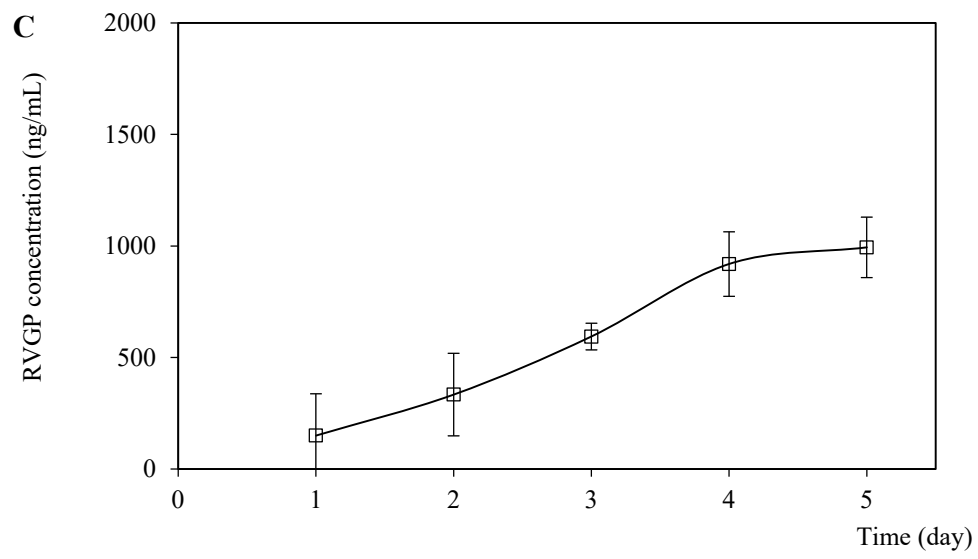

Figure S15. Perturbation graph of BVM MOI (A), BVG/BVM MOI ratio (B), and HT (C) on rabies G glycoprotein concentration (RVGP) (determined by ELISA) modelled statistically.

C

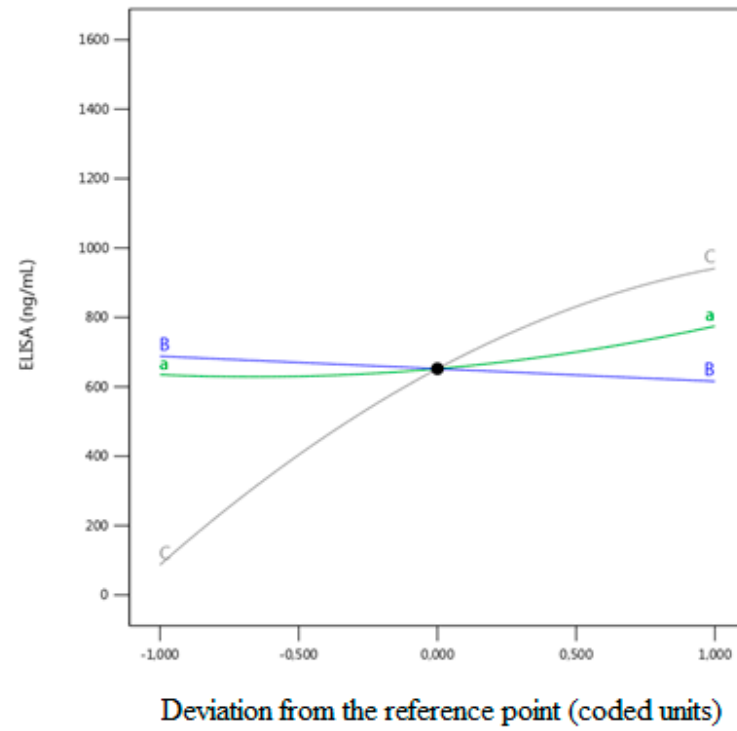

Supplement: s1 [file s1]
